# Supplementary material for: Ferroptosis-Related Gene Signature and Patterns of Immune Infiltration Predict the Overall Survival in Patients With Lung Adenocarcinoma
Source: Frontiers journal article supplement (doi:10.3389/fmolb.2021.692530), 2021-07-30

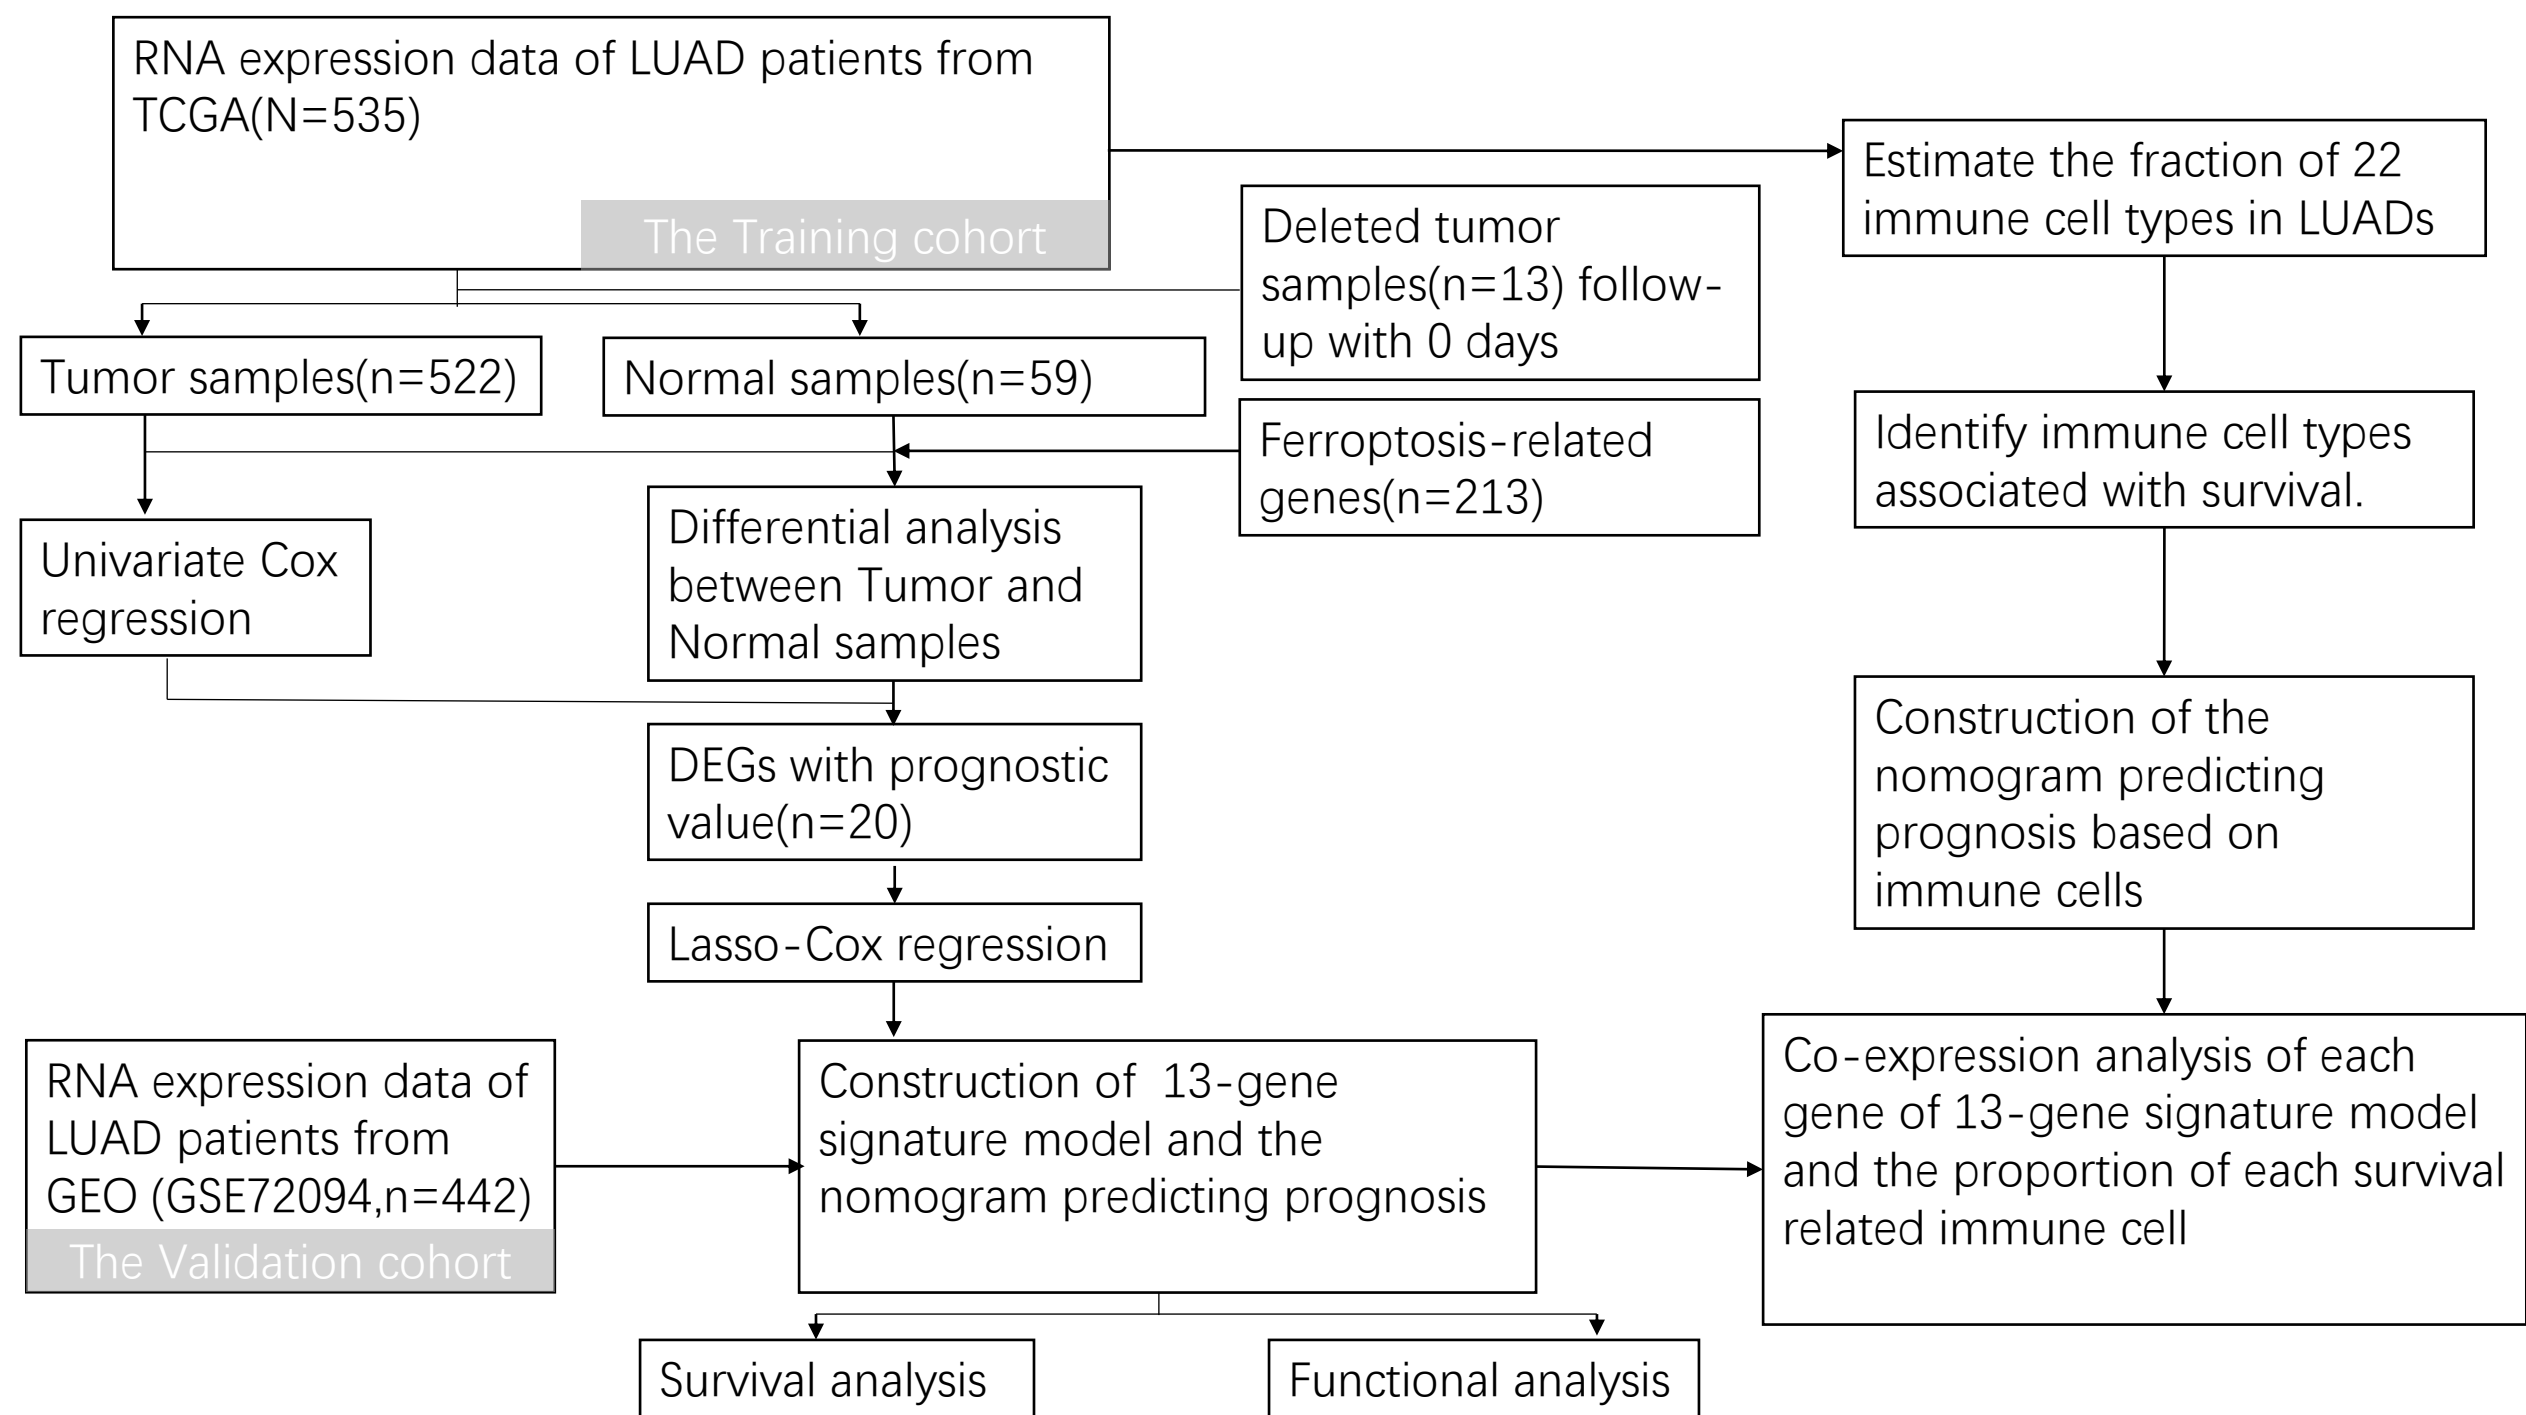

Supplement: Data_Sheet_1.PDF [file Data_Sheet_1.PDF]
