# Supplementary material for: Ferroptosis-Related Gene Signature and Patterns of Immune Infiltration Predict the Overall Survival in Patients With Lung Adenocarcinoma
Source: Front Mol Biosci. 2021 Jul 30;8:692530. doi: 10.3389/fmolb.2021.692530 (PMC8360867; doi:10.3389/fmolb.2021.692530)
Supplement: Supplementary file 3 [file Table4.XLS]

Gene	Coef
ANGPTL7	-0.00730246608828411
DDIT4	0.0528206731926306
SLC1A4	-0.0805562916353873
GDF15	-0.0133241270477627
SLC2A1	0.0190771055865449
RRM2	0.120880148290459
ALOXE3	0.0344341036485903
PHKG2	-0.083421112845532
LINC00472	-0.0185129725717757
LINC00336	-0.012283910033111
ALOX15	-0.0184097372513097
SLC7A11	0.0136117454509989
GLS2	-0.114668359129494
