# Supplementary material for: Ferroptosis-Related Gene Signature and Patterns of Immune Infiltration Predict the Overall Survival in Patients With Lung Adenocarcinoma
Source: Front Mol Biosci. 2021 Jul 30;8:692530. doi: 10.3389/fmolb.2021.692530 (PMC8360867; doi:10.3389/fmolb.2021.692530)
Supplement: Supplementary file 4 [file Table2.XLS]

gene	conMean	treatMean	logFC	pValue	fdr
DUSP1	39188.8474576271	16472.6953271028	-1.25036651015556	3.07447446570041e-15	1.58847847394521e-14
NCF2	5380.23728813559	2271.43364485981	-1.24406664159178	1.38419181378248e-18	8.87791990908763e-18
ALB	8.71186440677966	9052.4691588785	10.02111414138	0.000517255981496833	0.000728860701200083
TXNRD1	5548	21851.1345794393	1.97766849814781	1.11358683173834e-08	2.49550783979917e-08
SRXN1	67.6779661016949	236.405607476636	1.80450613875834	2.72077014732442e-07	5.50068747176459e-07
GPX2	78.864406779661	5672.8523364486	6.1685561736145	3.52640862301271e-10	8.98509594356663e-10
BNIP3	1461.4406779661	4308.27663551402	1.55971961945198	1.05177380912856e-18	6.98678316063972e-18
ANGPTL7	136.033898305085	12.792523364486	-3.41059342821725	1.08550910187051e-30	4.0380938589583e-29
DDIT4	2510.42372881356	7062.16635514019	1.49217991136431	1.66873620411063e-10	4.49833237629822e-10
ASNS	498.830508474576	2095.81869158878	2.07089230711095	1.26182242245869e-27	1.95582475481097e-26
DDIT3	539.525423728814	1150.06542056075	1.09195308039905	1.96076316822432e-09	4.73638895181459e-09
SLC1A4	893.779661016949	2477.1214953271	1.47067351011772	1.5884404400384e-19	1.13634585325824e-18
GPT2	279.762711864407	3861.63551401869	3.78693640886987	1.29005312204014e-33	2.39949880699466e-31
PSAT1	98.4915254237288	1526.53271028037	3.95411509839664	3.21735554061093e-31	1.99476043517878e-29
SLC7A5	859.898305084746	7128.23925233645	3.05130780401842	3.68916635227102e-26	4.90132101087436e-25
TRIB3	605.64406779661	1993.56261682243	1.71880683294088	2.77309578180473e-16	1.56301762247176e-15
ZFP69B	30.3898305084746	131.719626168224	2.11580978882567	1.05503211069635e-28	1.78396338717746e-27
GDF15	1343.37288135593	4675.6523364486	1.79930784993531	2.34964626006428e-07	4.8025736744171e-07
DRD4	17.6610169491525	42.0691588785047	1.25219455543891	3.59198652320004e-05	5.9652633331715e-05
SLC2A1	658.694915254237	9715.58691588785	3.882618832743	5.1816058722451e-31	2.40944673059397e-29
SLC2A14	15.8305084745763	42.5495327102804	1.4264356924963	0.00058470537436059	0.000812393279225994
HBA1	126.457627118644	8.04299065420561	-3.97477819991642	1.40804346410393e-29	3.00309797491982e-28
STMN1	2960.71186440678	8081.89906542056	1.44875023916451	6.09179339674203e-12	2.02334566391789e-11
RRM2	225.745762711864	2868.84672897196	3.66770007929853	3.57459923365446e-32	3.32437728729865e-30
AURKA	151.271186440678	1305.9738317757	3.10991686964223	4.23204993062219e-30	1.25040291247001e-28
MIR4715	1	0.435514018691589	-1.19920893663423	5.49212814599862e-07	1.08674025016568e-06
NOX1	30.4576271186441	108.039252336449	1.82668010674469	2.33196518458923e-18	1.44581841444532e-17
NOX4	89.5084745762712	275.467289719626	1.62178482964374	2.40418861324954e-14	1.09068068796199e-13
NOX5	9.45762711864407	107.203738317757	3.502733142417	1.09082314781557e-13	4.41071968464557e-13
DUOX1	9788.30508474576	2268.73644859813	-2.10917004269297	6.6982507149906e-29	1.24587463298825e-27
G6PD	2966.96610169492	9948.26355140187	1.74545628445605	2.18658807377532e-08	4.74998574091384e-08
KRAS	1922.81355932203	4057.20934579439	1.07726886308119	1.00213412952075e-13	4.1421544020191e-13
ALOX12B	10.271186440678	30.9046728971963	1.58922215605514	0.000443592234103227	0.000649670516088191
ALOXE3	3.71186440677966	33.7383177570093	3.18417212513405	9.14117036801662e-19	6.29725069796701e-18
PHKG2	804.305084745763	1900.61308411215	1.24065012053851	4.42514483368748e-20	3.57859538724292e-19
CDO1	477.864406779661	96.6803738317757	-2.30530635732309	4.70581741252156e-30	1.25040291247001e-28
SLC1A5	3821.66101694915	7790.45981308411	1.02750866610056	3.86925681927432e-14	1.71352801996434e-13
LINC00472	105.135593220339	35.792523364486	-1.55452100832148	7.51503254727165e-26	9.31864035861685e-25
GOT1	1168.16949152542	3016.42242990654	1.3685888703352	2.80277964038337e-18	1.68166778423002e-17
PRKAA2	246.864406779661	725.8	1.5558532149261	4.21481804370628e-09	9.7994519516171e-09
ACVR1B	1745.47457627119	3706.81121495327	1.08655929822473	1.45661101735914e-13	5.76446062188936e-13
IDH1	4116.40677966102	9644.2261682243	1.22827992908068	2.04056588127954e-14	9.9148403280876e-14
DPP4	2199.93220338983	7088.16448598131	1.68795301901306	3.01231198400528e-05	5.14027549564204e-05
CDKN2A	91.9661016949153	1354.6691588785	3.88069455728823	1.04571369286208e-15	5.72066902565726e-15
IFNG	15.3220338983051	48.4485981308411	1.66084710343013	0.000364085737884065	0.000537459898781239
MIOX	4.49152542372881	88.4841121495327	4.30014102874245	2.46907399158273e-24	2.70145742608463e-23
NFS1	597.762711864407	1325.43738317757	1.14882370511272	3.85698879003276e-20	3.26090870430042e-19
FH	1616.66101694915	3356.28971962617	1.05385005178244	1.10693528611987e-16	6.43406135057174e-16
CISD2	921.508474576271	1999.21121495327	1.11736156097559	2.2550252074217e-20	1.99730804085922e-19
LINC00336	3.32203389830508	11.7570093457944	1.82338242572478	3.25699469859497e-05	5.45766679224022e-05
CA9	19.9322033898305	1150.7738317757	5.85135930933233	3.0170042737572e-25	3.50726746824275e-24
PROM2	594.050847457627	4806.19813084112	3.01623779527546	1.60783412134992e-26	2.30043958900835e-25
HSPB1	10115.4237288136	23135.9887850467	1.1935820033083	1.04946263532458e-11	3.30847542661647e-11
NQO1	1578.1186440678	16325.6822429907	3.37086570524718	5.92677386953409e-23	5.80199968280706e-22
CHAC1	113.28813559322	281.444859813084	1.31285552076488	2.13685335245004e-14	9.93636808889269e-14
ATF3	7441.76271186441	2813.55700934579	-1.40324919328676	3.62851420325776e-11	1.05453694032179e-10
TF	72.3220338983051	2839.92523364486	5.29527388740149	0.000147192121349491	0.000222583207894352
RPL8	41795.2711864407	89399.7626168224	1.09693127893676	2.46318811902964e-12	8.64439604036817e-12
ALOX5	7290.94915254237	2655.21121495327	-1.4572800120118	5.01997498247659e-20	3.89048061141936e-19
ALOX15	1633.79661016949	411.220560747664	-1.99024408967285	1.72309047725002e-10	4.57849755383577e-10
SLC7A11	194.661016949153	2391.71962616822	3.619012374567	1.54440055841104e-20	1.43629251932227e-19
CBS	18.0169491525424	63.7177570093458	1.82234074476574	1.2730890811348e-05	2.23391102916106e-05
FANCD2	214.271186440678	837.383177570093	1.96645007525456	1.4531119233483e-29	3.00309797491982e-28
GCLC	1002.79661016949	6051.90093457944	2.59335934739108	2.07891813330869e-14	9.9148403280876e-14
GCLM	1066.16949152542	2935.64112149533	1.46123880624643	2.24322910545846e-11	6.72968731637538e-11
GLS2	25.864406779661	55.0672897196262	1.09022750164931	7.88413055797558e-05	0.000123230948217097
GSS	1323.10169491525	3014.05794392523	1.18778319951641	5.32636684085306e-20	3.96281692959468e-19
CRYAB	1679.83050847458	572.622429906542	-1.55265958767233	8.99491888006034e-24	9.29474950939568e-23
AIFM2	751.796610169491	1730.75700934579	1.20298887546246	3.42948986432711e-13	1.32892732242676e-12
STEAP3	1814.1186440678	4444.88971962617	1.29287881360076	1.06307088370877e-12	3.95462368739662e-12
