# Supplementary material for: Ferroptosis-Related Gene Signature and Patterns of Immune Infiltration Predict the Overall Survival in Patients With Lung Adenocarcinoma
Source: Front Mol Biosci. 2021 Jul 30;8:692530. doi: 10.3389/fmolb.2021.692530 (PMC8360867; doi:10.3389/fmolb.2021.692530)
Supplement: Supplementary file 13 [file Table1.XLSX]

## Sheet: Sheet1
Gene name
PTGS2
DUSP1
NOS2
NCF2
MT3
UBC
ALB
TXNRD1
SRXN1
GPX2
BNIP3
OXSR1
SELENOS
ANGPTL7
DDIT4
LOC284561
ASNS
TSC22D3
DDIT3
JDP2
SESN2
SLC1A4
PCK2
TXNIP
VLDLR
GPT2
PSAT1
LURAP1L
SLC7A5
HERPUD1
XBP1
SLC3A2
ZNF419
KLHL24
TRIB3
ZFP69B
ATP6V1G2
VEGFA
GDF15
TUBE1
ARRDC3
CEBPG
SNORA16A
RGS4
BLOC1S5-TXNDC5
LOC390705
EIF2S1
HSD17B11
AGPAT3
SETD1B
FTL
TFRC
DRD5
DRD4
MAP3K5
MAPK14
SLC2A1
SLC2A3
SLC2A6
SLC2A8
SLC2A12
GLUT13
SLC2A14
EIF2AK4
HBA1
NNMT
PLIN4
HIC1
STMN1
RRM2
CAPG
HNF4A
NGB
YWHAE
GABPB1
AURKA
MIR4715
RIPK1
PRDX1
MAFG
MIR30B
IREB2
CS
EMC2
ACSF2
NOX1
CYBB
NOX3
NOX4
NOX5
DUOX1
DUOX2
G6PD
PGD
ACSL4
LPCAT3
NRAS
KRAS
HRAS
NCOA4
ALOX12B
ALOX15B
ALOXE3
PHKG2
EGFR
MAPK3
MAPK1
ZEB1
SOCS1
CDO1
MYB
SLC1A5
LINC00472
GOT1
PRKAA2
PRKAA1
BAP1
ABCC1
MIR6852
ACVR1B
TGFBR1
TNFAIP3
ATM
IDH1
TAZ
BECN1
LONP1
KEAP1
ATG5
ATG7
SAT1
DPP4
CDKN2A
PEBP1
IFNG
ANO6
YY1AP1
EGLN2
MIOX
MTDH
FBXW7
PANX1
DNAJB6
CARS1
AKR1C1
AKR1C2
AKR1C3
MUC1
NFE2L2
SLC40A1
CISD1
SCD
FADS2
SRC
STAT3
PML
NFS1
TP63
CDKN1A
FH
CISD2
MIR9-1
MIR9-2
MIR9-3
SQSTM1
ISCU
ACSL3
CD44
LINC00336
BRD4
PRDX6
MIR17
CA9
LAMP2
PROM2
GCH1
RB1
HSPB1
HSF1
NQO1
MT1G
CHAC1
ATF3
TF
RPL8
ATP5MC3
ALOX5
ALOX12
ALOX15
ELAVL1
HMGB1
HMOX1
SLC7A11
CBS
ATF4
FTH1
GPX4
VDAC2
TP53
FANCD2
GCLC
GCLM
GLS2
GSS
HMGCR
CRYAB
FDFT1
AIFM2
HSBP1
ACO1
STEAP3
ACACA
SQLE
